# Supplementary material for: Pd/Ni-metal–organic framework-derived porous carbon nanosheets for efficient CO oxidation over a wide pH range
Source: Royal Society of Chemistry journal article supplement (doi:10.1039/d2na00455k), 2022-01-01
Supplement: d2na00455k1.pdf [file d2na00455k1.pdf]

## Supplementary Information

### Pd/Ni-Metal-organic Framework-derived Porous Carbon Nanosheets for Efficient CO Oxidation over a Wide pH Range

Adewale K. Ipadeola<sup>a</sup>, Kamel Eid<sup>b\*</sup>, Aboubakr M. Abdullah<sup>a\*</sup>, Rashid S. Al-Hajri<sup>c</sup>, and Kenneth I. Ozoemena<sup>d\*</sup>

<sup>a</sup>Center for Advanced Materials, Qatar University, Doha 2713, Qatar. E-mail: bakr@qu.edu.qa

<sup>b</sup>Gas Processing Center(GPC), College of Engineering, Qatar University, Doha 2713, Qatar. E-mail: kamel.eid@qu.edu.qa

<sup>d</sup>Petroleum and Chemical Engineering Department, Sultan Qaboos University, Muscat, Oman

<sup>d</sup>Molecular Sciences Institute, School of Chemistry, University of the Witwatersrand, Private Bag 3, PO Wits, Johannesburg 2050, South Africa. E-mail: Kenneth.ozoemena@wits.ac.za

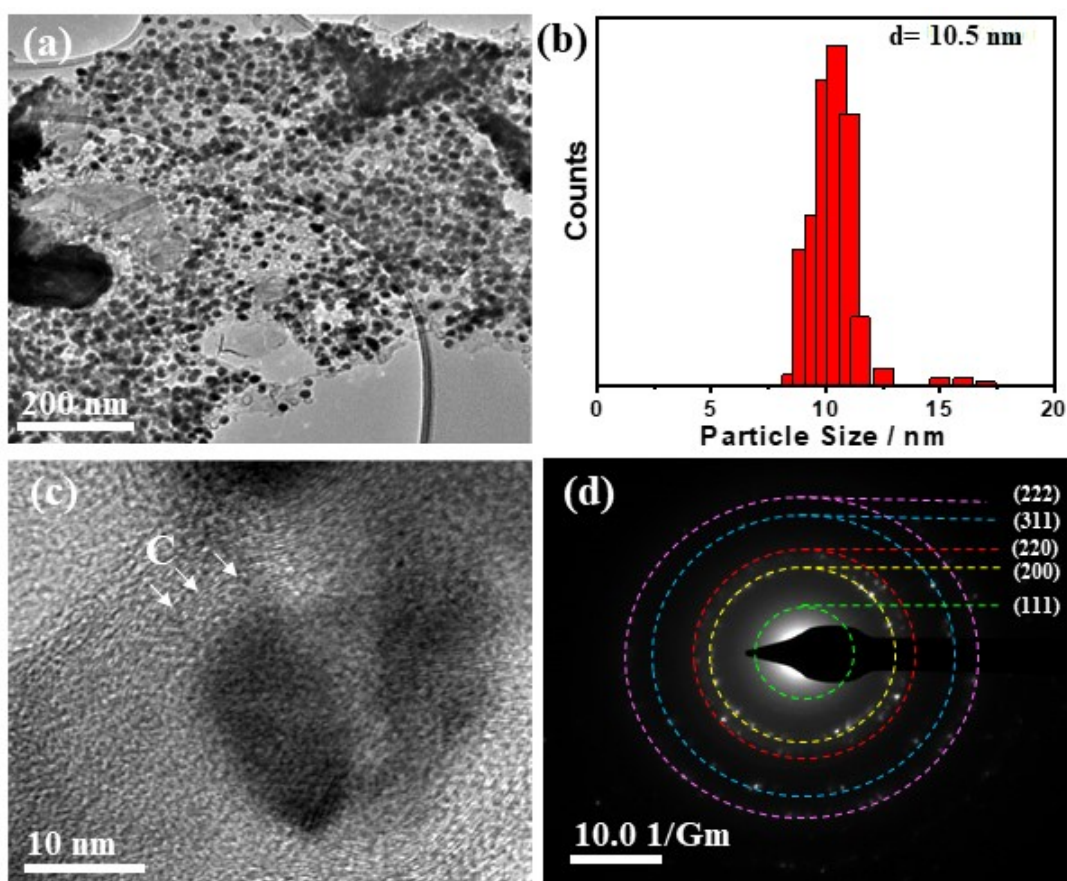

**Figure S1.** (a) TEM image, (b) particle size distribution of Pd nanoparticles, (c) HRTEM image and (d) SAED of Pd/Ni-MOF/C

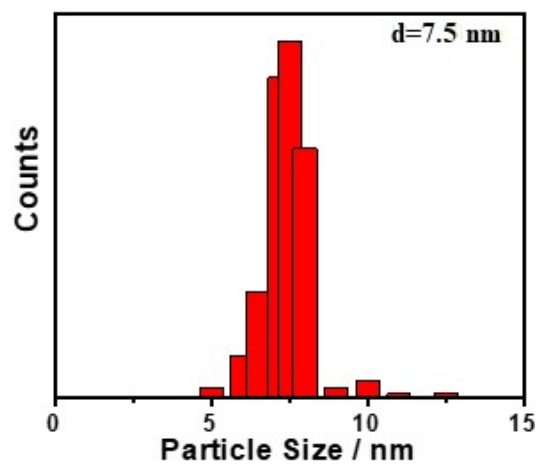

Figure S2. Particle size distribution of Pd nanoparticles in Pd/Ni-MOF/PC

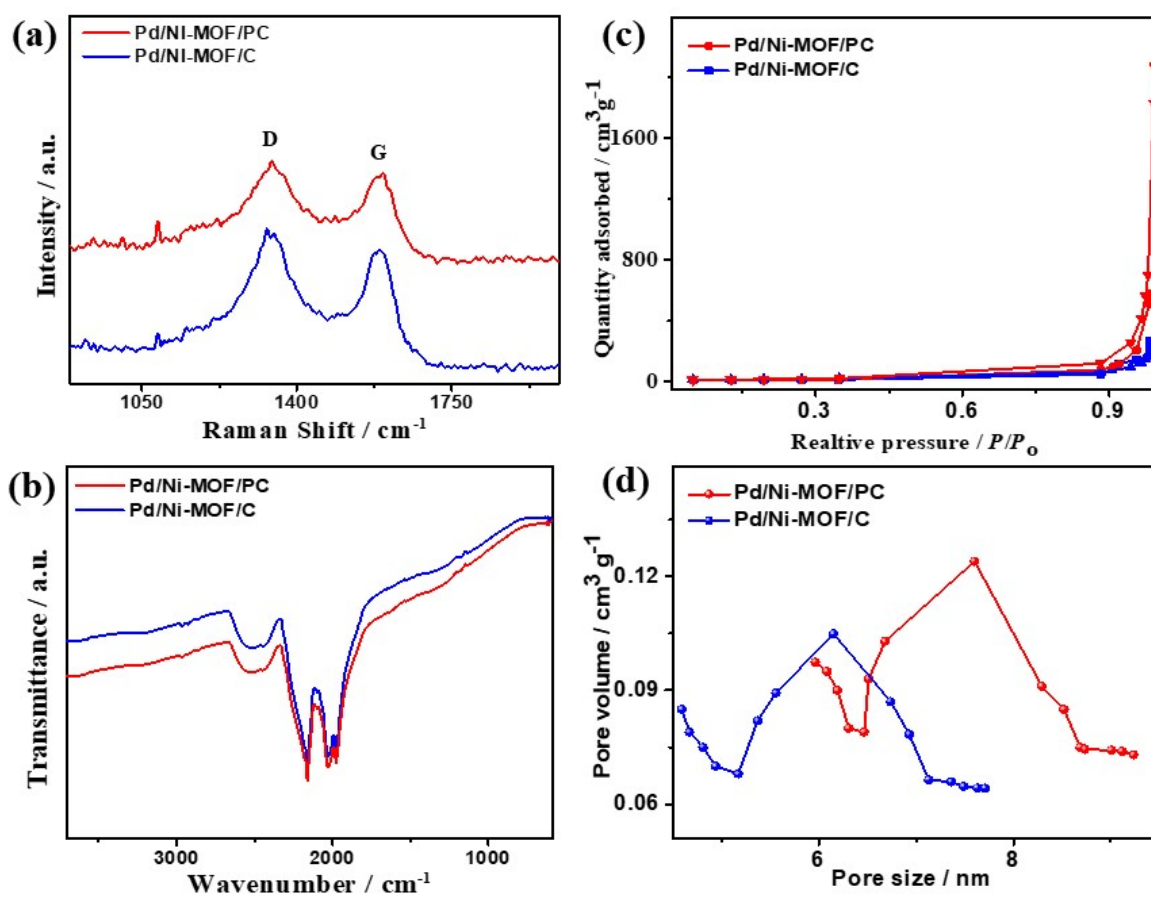

Figure S3. (a) Raman spectra, (b) FTIR spectra and (c,d) BET surface analysis of Pd/Ni-MOF/PC and Pd/Ni-MOF/C

Table S1: ICP-OES and BET analysis of Pd/Ni-MOF/PC and Pd/Ni-MOF/C

| Elemental composition/ BET data      | Pd/Ni-MOF/PC | Pd/Ni-MOF/C  |
|--------------------------------------|--------------|--------------|
| Pd (wt. %)                           | 14.26 ± 0.25 | 21.40 ± 1.05 |
| Ni (wt. %)                           | 14.94 ± 0.69 | 43.12 ± 0.91 |
| Pore size / nm                       | 7.60         | 6.15         |
| Pore volume / cm <sup>3</sup> /g     | 0.1240       | 0.1049       |
| BET Surface area / m <sup>2</sup> /g | 153.0463     | 142.2231     |

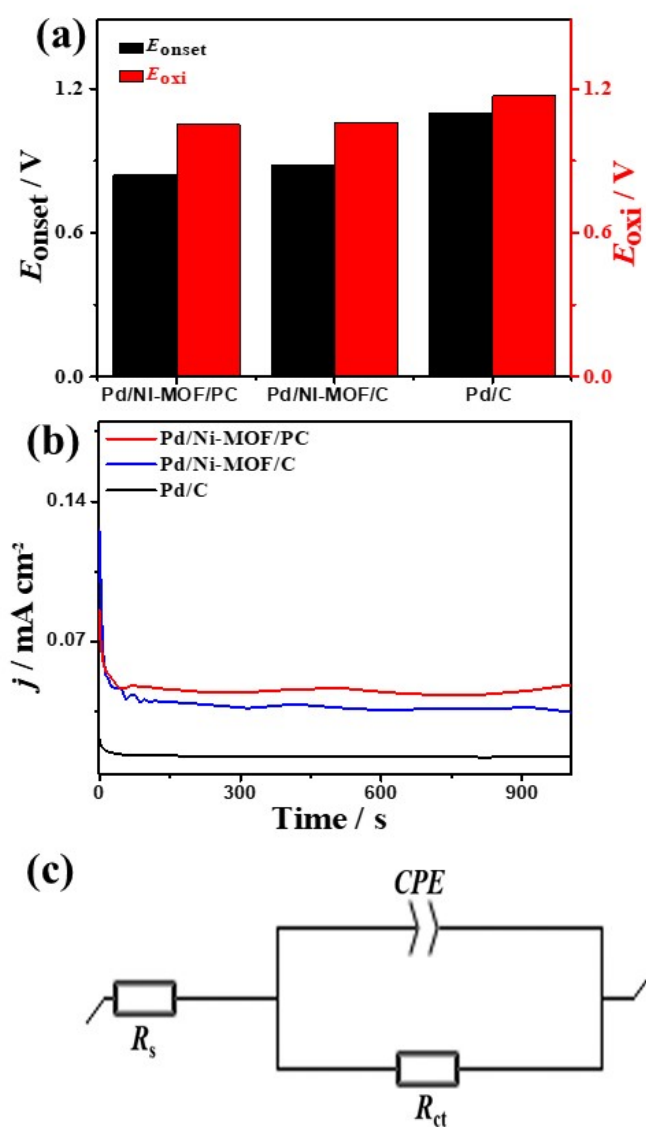

**Figure S4.** (a) Bar chart of  $E_{\text{onset}}$  and  $E_{\text{oxi}}$ , (b) Chronoamperometry in CO-saturated 0.1 M HClO<sub>4</sub>, and (c) Voigt electrical equivalent circuit (EEC)

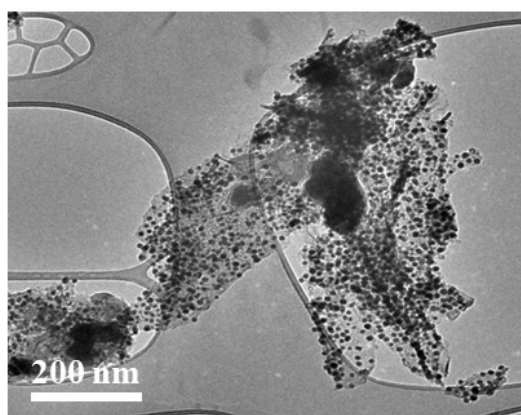

Figure S5. TEM of Pd/Ni-MOF/PC after stability

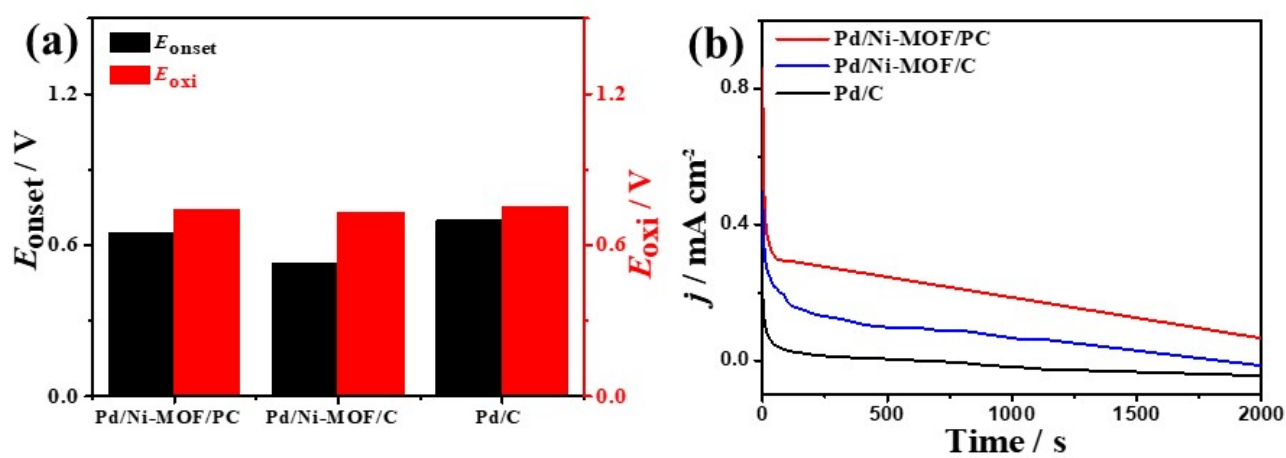

Figure S6. (a) Bar chart of  $E_{\text{onset}}$  and  $E_{\text{oxi}}$  and (b) Chronoamperometry in CO-saturated 0.1 M KOH

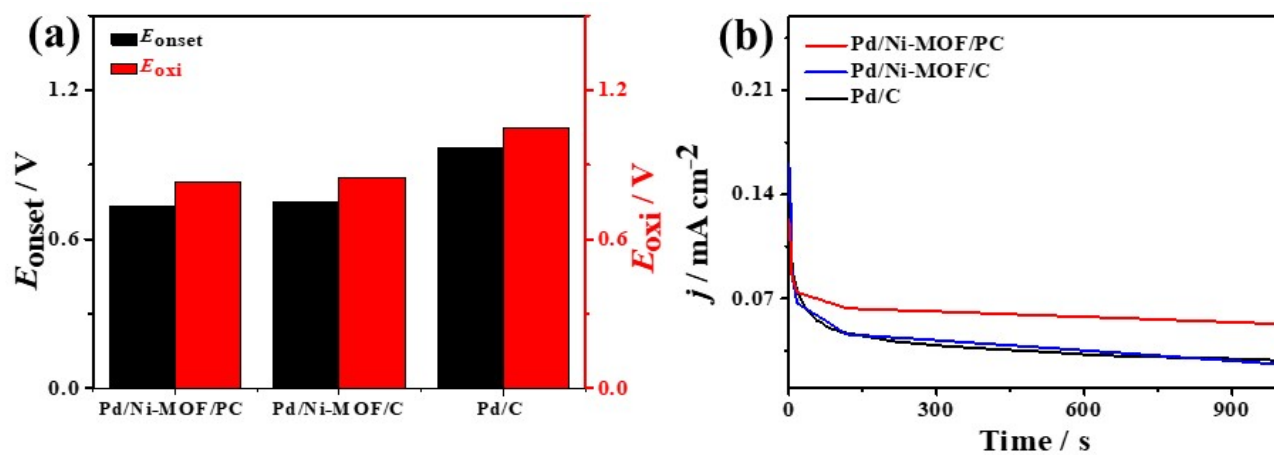

Figure S7. (a) Bar chart of  $E_{\text{onset}}$  and  $E_{\text{oxi}}$  and (b) Chronoamperometry in CO-saturated 0.1 M NaHCO<sub>3</sub>

**Table S2:** Comparative CO oxidation of the electrocatalysts with literature.  $^{\circ}$ mA, Scan rates (v), Reference electrodes (REs), Maximum current ( $I_{\text{Anode}}$ ), and oxidation potential ( $E_{\text{Oxi}}$ )

| Electrocatalysts                                 | Medium / v (mV/s) / REs                                           | $I_{\text{Anode}}$ (mA/cm <sup>2</sup> ) / $E_{\text{Oxi}}$ (V) | Refs.     |
|--------------------------------------------------|-------------------------------------------------------------------|-----------------------------------------------------------------|-----------|
| Pt(110)-Ru                                       | 0.5 M H <sub>2</sub> SO <sub>4</sub> / 100 / RHE                  | $^{\circ}$ 0.025 / 0.50                                         | 1         |
| Pt-NbO <sub>x</sub>                              | 0.5 M H <sub>2</sub> SO <sub>4</sub> / 20 / RHE                   | 0.500 / 0.75                                                    | 2         |
| Well-ordered Pt(111)                             | 0.1 M NaOH / 50 / RHE                                             | 0.500 / 0.80                                                    | 3         |
| PtRu (1:1)                                       | 0.1 M HClO <sub>4</sub> / 50 / Ag/AgCl                            | 0.120 / 0.25                                                    | 4         |
| Pt/SnO <sub>x</sub>                              | 1 M HClO <sub>4</sub> / 20 / RHE                                  | 0.870 / 0.70                                                    | 5         |
| Pd/Ti <sub>3</sub> C <sub>2</sub> T <sub>x</sub> | 0.1 M HClO <sub>4</sub> / 50 / Ag/AgCl                            | 0.31 / 0.9                                                      | 6         |
| Pt(FAM)                                          | 0.1 M H <sub>2</sub> SO <sub>4</sub> / 50 / RHE                   | 0.320 / 0.72                                                    | 7         |
| Dendrimer-encapsulated Pt nanoparticles          | 0.1 M HClO <sub>4</sub> / 50 / Hg/Hg <sub>2</sub> SO <sub>4</sub> | 0.200 / 0.30                                                    | 8         |
| Polycrystalline Pd                               | 0.5 M H <sub>2</sub> SO <sub>4</sub> / 20 / RHE                   | 0.175 / 0.90                                                    | 9         |
| PdAg/C                                           | 0.5 KOH / 20 / RHE                                                | 0.944 / 0.60                                                    | 10        |
| PtPd nanodendrites                               | 1.0 M KOH / 50 / Ag/AgCl                                          | 5.100 / -0.15                                                   | 11        |
| 60 wt. % Pt/C                                    | 0.5 H <sub>2</sub> SO <sub>4</sub> / 10 / SHE                     | 0.200 / 0.64                                                    | 12        |
| PtRu@h-BN/C                                      | 0.1 M H <sub>2</sub> SO <sub>4</sub> / 20 / RHE                   | 1.250 / 0.60                                                    | 13        |
| PtNi multicubes                                  | 1 M KOH / 50 / RHE                                                | 0.580 / 0.65                                                    | 14        |
| Pt polyhedron with smooth surfaces               | 0.5 M H <sub>2</sub> SO <sub>4</sub> / 50 / RHE                   | 0.300 / 0.80                                                    | 15        |
| Pd/Ni-MOF/PC                                     | 0.1 M HClO <sub>4</sub> / 50 / RHE                                | 4.701 / 1.05                                                    | This work |
|                                                  | 0.1 M KOH / 50 / RHE                                              | 3.936 / 0.74                                                    |           |
|                                                  | 0.1 M NaHCO <sub>3</sub> / 50 / RHE                               | 1.220 / 0.83                                                    |           |
| Pd/Ni-MOF/C                                      | 0.1 M HClO <sub>4</sub> / 50 / RHE                                | 1.356 / 1.06                                                    | This work |
|                                                  | 0.1M KOH / 50 / RHE                                               | 2.660 / 0.73                                                    |           |
|                                                  | 0.1 M NaHCO <sub>3</sub> / 50 / RHE                               | 0.526 / 0.85                                                    |           |

## References

1. J. C. Davies, B. E. Hayden and D. J. Pegg, *Electrochim. acta*, 1998, **44**, 1181-1190.
2. A. Ueda, Y. Yamada, T. Ioroi, N. Fujiwara, K. Yasuda, Y. Miyazaki and T. Kobayashi, *Catal. Today*, 2003, **84**, 223-229.
3. J. Spendelow, J. Goodpaster, P. J. A. Kenis and A. Wieckowski, *J. Phys. Chem.*, 2006, **110**, 9545-9555.
4. B. Du, S. A. Rabb, C. Zangmeister and Y. Tong, *Phys. Chem. Chem. Phys.*, 2009, **11**, 8231-8239.
5. T. Matsui, K. Fujiwara, T. Okanishi, R. Kikuchi, T. Takeguchi and K. Eguchi, *J. Power Sources*, 2006, **155**, 152-156.
6. B. Salah, K. Eid, A. M. Abdelgwad, Y. Ibrahim, A. M. Abdullah, M. K. Hassan and K. I. Ozoemena, *Electroanalysis*, 2022, **34**, 677-683.
7. E. G. Ciapina, S. F. Santos and E. R. Gonzalez, *J. Electroanal. Chem.*, 2010, **644**, 132-143.
8. M. G. Weir, V. S. Myers, A. I. Frenkel and R. M. J. C. Crooks, *ChemPhysChem*, 2010, **11**, 2942-2950.
9. L.-l. Fang, Q. Tao, M.-f. Li, L.-w. Liao, D. Chen and Y.-x. Chen, *Chinese J. Chem. Phys.*, 2010, **23**, 543-548.
10. T. Jurzinsky, C. Cremers, K. Pinkwart and J. Tübke, *Electrochim. Acta*, 2016, **199**, 270-279.
11. K. Eid, Y. H. Ahmad, H. Yu, Y. Li, X. Li, S. Y. AlQaradawi, H. Wang and L. J. N. Wang, *Nanoscale*, 2017, **9**, 18881-18889.
12. I. J. McPherson, P. A. Ash, L. Jones, A. Varambhia, R. M. Jacobs and K. A. Vincent, *J. Phys. Chem. C*, 2017, **121**, 17176-17187.
13. M. Sun, Y. Lv, Y. Song, H. Wu, G. Wang, H. Zhang, M. Chen, Q. Fu and X. Bao, *Appl. Surf. Sci.*, 2018, **450**, 244-250.
14. F. Wu, K. Eid, A. M. Abdullah, W. Niu, C. Wang, Y. Lan, A. A. Elzatahry and G. Xu, *ACS Appl. Mater. Interfaces*, 2020, **12**, 31309-31318.
15. D. Shen, Y. Liu, G. Yang, H. Yu, P.-F. Liu and F. Peng, *Appl. Catal. B.I*, 2021, **281**, 119522.
